# Supplementary material for: Bioactive Carboxymethyl Cellulose (CMC)-Based Films Modified with Melanin and Silver Nanoparticles (AgNPs)—The Effect of the Degree of CMC Substitution on the In Situ Synthesis of AgNPs and Films’ Functional Properties
Source: MDPI journal article supplement (doi:10.3390/ijms232415560), 2022-12-08
Supplement: s1 [file s1]

| Sample    | SD 0.7                                                                              | SD 0.9                                                                              | SD 1.2                                                                               | Microorganism                |
|-----------|-------------------------------------------------------------------------------------|-------------------------------------------------------------------------------------|--------------------------------------------------------------------------------------|------------------------------|
| CMC + MEL | 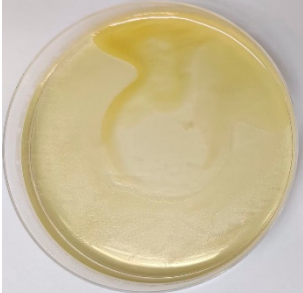   |    |    | <i>Candida albicans</i>      |
| CMC + Ag  |    |    |    |                              |
| CMC + MEL |   |   |   | <i>Staphylococcus aureus</i> |
| CMC + Ag  |  |  |  |                              |
| CMC + MEL |  |  |  | <i>Escherichia coli</i>      |
| CMC + Ag  |  |  |  |                              |

|           |                                                                                     |                                                                                     |                                                                                      |                               |
|-----------|-------------------------------------------------------------------------------------|-------------------------------------------------------------------------------------|--------------------------------------------------------------------------------------|-------------------------------|
| CMC + MEL | 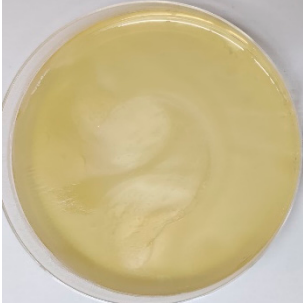   |    |    | <i>Bacillus cereus</i>        |
| CMC + Ag  |    |    |    |                               |
| CMC + MEL |   |   |   | <i>Pseudomonas aeruginosa</i> |
| CMC + Ag  |  |  |  |                               |

Table S1. Representative photos of growth inhibition zones of melanin-modified and AgNPs-modified films
